# Supplementary material for: Blood tumor mutational burden and dynamic changes in circulating tumor DNA predict response to pembrolizumab treatment in advanced non-small cell lung cancer
Source: PubMed Central journal article supplement — Transl Lung Cancer Res. 2023 May 9;12(5):971–84. doi: 10.21037/tlcr-22-818 (PMC10261859; doi:10.21037/tlcr-22-818), 2023-05-09
Supplement: tlcr-12-05-971-dss.pdf [file tlcr-12-05-971-dss.pdf]

## Data Sharing Statement

|                     |                                                                                                                                                     |                                                                                                                  |
|---------------------|-----------------------------------------------------------------------------------------------------------------------------------------------------|------------------------------------------------------------------------------------------------------------------|
| <b>Article Info</b> | <a href="https://dx.doi.org/10.21037/tlcr-22-818">https://dx.doi.org/10.21037/tlcr-22-818</a>                                                       |                                                                                                                  |
| <b>Item</b>         | <b>Question</b>                                                                                                                                     | <b>Authors' Response<br/>(place "-" if not applicable)</b>                                                       |
| 1                   | Would you like to share data collected for your study to others?                                                                                    | Yes                                                                                                              |
| 2                   | If not, would you like to share the reason for your decision?                                                                                       | -                                                                                                                |
| 3                   | What data in particular will be shared?                                                                                                             | Survival data and unidentifiable patient baseline characteristics information.                                   |
| 4                   | Any other documents will be shared? Such as study protocol, statistical analysis plan, informed consent form, clinical study report, analytic code. | No                                                                                                               |
| 5                   | When will data availability begin?                                                                                                                  | At the publication date.                                                                                         |
| 6                   | When will data availability end?                                                                                                                    | One year after publication since the survival data may be updated over time.                                     |
| 7                   | To whom will you share the data?                                                                                                                    | Researchers within the field of NSCLC and immunotherapy research.                                                |
| 8                   | For what type of analysis or purpose?                                                                                                               | Biomarker studies or meta-analyses.                                                                              |
| 9                   | How or where can the data/documents be obtained?                                                                                                    | By contacting the corresponding author Boe Soerensen at boesoere@rm.dk                                           |
| 10                  | Any other restrictions?                                                                                                                             | We may balance the potential benefits and risks for each request and then provide the data that could be shared. |
